# Supplementary material for: Misinformation, perceptions towards COVID-19 and willingness to be vaccinated: A population-based survey in Yemen
Source: PubMed Central journal article supplement (PMC8555792; doi:10.1371/journal.pone.0248325), 2021-10-29
Supplement: pone.0248325.s001.pdf [file pone.0248325.s001.pdf]

# Misinformation, perceptions towards the COVID-19, and willingness to vaccinate in Yemen: A population-based survey

## Section A: Demographic data

-Your Age: .....

-Your Gender:  Male  Female

-Current place of residence (governorate): .....

- Residence area:  Urban  Rural

- Monthly income:

- |                                                                 |                                                                     |
|-----------------------------------------------------------------|---------------------------------------------------------------------|
| <input type="checkbox"/> Less than 30 thousand Yemeni Rials     | <input type="checkbox"/> 30 to less than 60 thousand Yemeni Rials   |
| <input type="checkbox"/> 60 thousand to less than 120 thousand  | <input type="checkbox"/> 120 to less than 180 thousand Yemeni Rials |
| <input type="checkbox"/> 180 thousand to less than 240 thousand | <input type="checkbox"/> Equal or more than 240 thousand            |

- Marital status:  Single  Married  Divorced/widowed

-Do you have medical insurance?

- Yes  No

-Education level:

- No formal education
- Primary
- Secondary
- Diploma
- Bachelor
- Postgraduate

-Your current work nature:  Unemployed  Employed  Daily-wage workers

- Are you a current smoker?       Yes                       No

- Are you a current Kat chewer?    Yes                       No

- Do you have any chronic diseases (such as high blood pressure, diabetes, heart disease, lung disease, liver disease, etc.)?    Yes                       No

| <b>Section B: COVID-19 Misinformation:</b>                                                   |                                                                                                 |                          |                 |                |              |                       |
|----------------------------------------------------------------------------------------------|-------------------------------------------------------------------------------------------------|--------------------------|-----------------|----------------|--------------|-----------------------|
| In this section, we want to know how much you agree or disagree with the following sentences |                                                                                                 |                          |                 |                |              |                       |
|                                                                                              |                                                                                                 | <b>Strongly disagree</b> | <b>Disagree</b> | <b>Neutral</b> | <b>Agree</b> | <b>Strongly agree</b> |
| 1                                                                                            | COVID-19 is human-made for pharmaceutical companies' financial gains                            |                          |                 |                |              |                       |
| 2                                                                                            | COVID-19 was created by humans as a biological weapon                                           |                          |                 |                |              |                       |
| 3                                                                                            | COVID-19 virus cannot be transmitted in areas with hot climates                                 |                          |                 |                |              |                       |
| 4                                                                                            | Children will not be infected or carry the virus                                                |                          |                 |                |              |                       |
| 5                                                                                            | Most people who get the coronavirus will die                                                    |                          |                 |                |              |                       |
| 6                                                                                            | COVID-19 can be prevented or treated by eating raw garlic and drinking hot tea containing anise |                          |                 |                |              |                       |
| 7                                                                                            | Antibiotics are effective in preventing and treating the new coronavirus                        |                          |                 |                |              |                       |

| <b>Section C: COVID-19 perceptions</b> |                                                                                                     |                          |                        |                        |                    |
|----------------------------------------|-----------------------------------------------------------------------------------------------------|--------------------------|------------------------|------------------------|--------------------|
| <b>A. Perceived susceptibility</b>     |                                                                                                     | <b>Not at All Likely</b> | <b>Slightly Likely</b> | <b>Somewhat Likely</b> | <b>Very Likely</b> |
| 1                                      | How likely is it that you will be infected with COVID-19 within the next few months?                |                          |                        |                        |                    |
| 2                                      | How likely is it that one of your family will be infected with COVID-19 within the next few months? |                          |                        |                        |                    |
| 3                                      | How likely is the onset of the COVID-19 outbreak in your city within the next few months?           |                          |                        |                        |                    |

|                                     |                                                                                                                             |                             |                           |                             |                       |
|-------------------------------------|-----------------------------------------------------------------------------------------------------------------------------|-----------------------------|---------------------------|-----------------------------|-----------------------|
| <b>4</b>                            | How likely is the onset of the COVID-19 outbreak in your governorate within the next few months?                            |                             |                           |                             |                       |
| <b>B. Perceived severity/threat</b> |                                                                                                                             |                             |                           |                             |                       |
|                                     |                                                                                                                             | <b>Not dangerous at all</b> | <b>Slightly dangerous</b> | <b>Moderately dangerous</b> | <b>Very dangerous</b> |
| <b>1</b>                            | In general, how dangerous do you think the COVID-19 pandemic is?                                                            |                             |                           |                             |                       |
| <b>2</b>                            | How dangerous do you think it would be if you were diagnosed with COVID-19?                                                 |                             |                           |                             |                       |
| <b>3</b>                            | How dangerous do you think would COVID-19 be on you if it began to spread to your community?                                |                             |                           |                             |                       |
| <b>4</b>                            | How dangerous do you think it would be for your city if COVID-19 started spreading in your governorate?                     |                             |                           |                             |                       |
| <b>5</b>                            | How dangerous do you think the consequences of COVID-19 disease would be on your country?                                   |                             |                           |                             |                       |
| <b>C. Perceived Worry</b>           |                                                                                                                             |                             |                           |                             |                       |
|                                     |                                                                                                                             | <b>Not at all worried</b>   | <b>Slightly worried</b>   | <b>Moderately worried</b>   | <b>Very worried</b>   |
| <b>1</b>                            | How worried are you about COVID-19 at this moment?                                                                          |                             |                           |                             |                       |
| <b>2</b>                            | How worried are you that you will be infected with COVID-19 in the next few months?                                         |                             |                           |                             |                       |
| <b>3</b>                            | How worried are you that someone you know (relatives, friends, etc.) will be infected with COVID-19 in the next few months? |                             |                           |                             |                       |
| <b>4</b>                            | How worried are you that an outbreak of COVID-19 will happen in your city?                                                  |                             |                           |                             |                       |
| <b>5</b>                            | How worried are you that you will not be able to go outside of your house if a COVID-19 outbreak happens in your city?      |                             |                           |                             |                       |

**Section D: Willingness to vaccinate:**

1. If there was a free effective vaccine that could prevent COVID-19, would you take it?

- a. Yes
- b. No
- c. Not sure

2. If an effective vaccine is available to prevent COVID-19 with a cost of 10 thousand Yemeni riyals (approximately 15\$ at the time of study period), would you take it?

- a. Yes
- b. No
- C. Not sure

**If your answer to the previous question (Q2) was “No” or “Not sure,” what factors could prevent you from taking a vaccine to prevent COVID-19, if available?**

**(Please select all that apply):**

- I am not at risk for covid-19, so I do not need it
- The cost of the vaccine (10 thousand Yemeni riyals)
- Concerns about vaccine safety and unexpected side effects
- Lack of confidence in the effectiveness of the vaccine
- I will wait for more studies and results on the vaccine
